# Supplementary material for: Evolving approaches to integration of computational with experimental chemistry: an example from osmium hydrido (η1/η2-)nitrosyl/nitroxyl chemistry
Source: Royal Society of Chemistry journal article supplement (doi:10.1039/b205506f), 2002-01-01
Supplement: b205506f.doc [file b205506f.doc]

**Evolving Approaches to Integration of Computational with Experimental Chemistry: An Example From Osmium Hydrido (1/2-) Nitrosyl/Nitroxyl Chemistry**

Andrei N. Vedernikov* and Kenneth G. Caulton*

**Supplementary Information**

**Computational details**

Theoretical calculations in this work have been performed using density functional theory (DFT) method;1 specifically the generalized gradient approximation (GGA) for the exchange-correlation functional by Perdew, Burke and Ernzerhof (PBE)2 was employed implemented in an original program package “Priroda”.3 In PBE calculations relativistic Stevens-Basch-Krauss (SBK) effective core potentials (ECP) 4 optimized for DFT-calculations have been used. Basis set was 311-split for main group elements with one additional polarization p-function for hydrogen, with additional two polarization d-functions for elements of higher periods. Full geometry optimization has been performed without constraints on symmetry using analytical gradients and followed by analytical calculation of the second derivatives of energy with respect to coordinate in order to characterize the nature of the resulting stationary points (minima or saddle points) found on the potential energy surface. For all species under investigation frequency analysis has been carried out. All minima have been checked for the absence of imaginary frequencies. Zero-point vibrational energies and thermodynamic functions were calculated in the harmonic approximation.

( 1 ) Parr, R.G.; Yang, W. Density-functional theory of atoms and molecules; Oxford university press: Oxford, 1989.

( 2 ) Perdew, J.P. ; Burke, K.; Ernzerhof, M. *Phys. Rev. Lett.* **1996**, *77*, 3865.

( 3 ) Ustynyuk, Yu.A.; Ustynyuk, L.Yu.; Laikov, D.N.; Lunin, V.V. *J. Organomet. Chem*. **2000**, *597*, 182.

( 4 ) Stevens, W.J.; Basch, H.; Krauss, M. *J. Chem. Phys*. **1984**, *81*, 6026; Stevens, W.J.; Basch, H.; Krauss, M.; Jasien, P. *Can. J. Chem*. **1992**, *70*, 612; Cundari, T.R.; Stevens, W.J. *J. Chem. Phys*. **1993**, *98*. 5555.
